# Supplementary material
Source: MDPI journal article supplement (https://www.mdpi.com/2673-4931/16/1/15)
Supplement: s1 [file s1]

**Table S1.** Phosphorus (P), nitrogen (N), potassium (K), calcium (Ca), sodium (Na) and chlorine (Cl) uptake of date palm plants grown in the absence (0 mM NaCl) and presence (240 mM NaCl) of salt stress with the application of compost and AMF alone or in combination after 10 and 14 months of cultivation.

| NaCl Level | Treatment s  | 10 Months of Cultivation  |                          |                            |                           |                           |                           | 14 Months of Cultivation  |                          |                            |                            |                            |                            |
|------------|--------------|---------------------------|--------------------------|----------------------------|---------------------------|---------------------------|---------------------------|---------------------------|--------------------------|----------------------------|----------------------------|----------------------------|----------------------------|
|            |              | P                         | N                        | K                          | Ca                        | Na                        | Cl                        | P                         | N                        | K                          | Ca                         | Na                         | Cl                         |
| 0 mM       | Control      | 2.97 ± 0.41 <sup>jk</sup> | 2.61 ± 0.24 <sup>h</sup> | 15.08 ± 1.32 <sup>g</sup>  | 16.07 ± 0.98 <sup>f</sup> | 29.26 ± 1.30 <sup>j</sup> | 42.93 ± 2.39 <sup>i</sup> | 3.61 ± 0.22 <sup>j</sup>  | 2.64 ± 0.10 <sup>h</sup> | 13.41 ± 1.35 <sup>hi</sup> | 13.92 ± 0.76 <sup>g</sup>  | 28.60 ± 1.58 <sup>i</sup>  | 44.72 ± 3.83 <sup>hi</sup> |
|            | Compost      | 8.16 ± 0.77 <sup>f</sup>  | 5.49 ± 0.06 <sup>a</sup> | 29.55 ± 2.32 <sup>a</sup>  | 20.12 ± 0.29 <sup>b</sup> | 36.21 ± 1.42 <sup>h</sup> | 49.72 ± 1.48 <sup>g</sup> | 6.87 ± 0.30 <sup>g</sup>  | 4.51 ± 0.22 <sup>b</sup> | 25.55 ± 1.13 <sup>b</sup>  | 17.99 ± 0.69 <sup>d</sup>  | 34.88 ± 1.78 <sup>hi</sup> | 52.89 ± 3.73 <sup>f</sup>  |
|            | AMF          | 10.86 ± 0.99 <sup>d</sup> | 4.35 ± 0.08 <sup>c</sup> | 21.64 ± 0.66 <sup>cd</sup> | 20.91 ± 0.28 <sup>b</sup> | 38.91 ± 3.96 <sup>g</sup> | 49.17 ± 3.16 <sup>g</sup> | 9.94 ± 2.24 <sup>e</sup>  | 4.02 ± 0.28 <sup>d</sup> | 21.64 ± 1.48 <sup>cd</sup> | 20.78 ± 1.79 <sup>b</sup>  | 32.57 ± 2.39 <sup>i</sup>  | 47.28 ± 3.48 <sup>gh</sup> |
|            | Compost+ AMF | 19.49 ± 1.01 <sup>a</sup> | 4.62 ± 0.08 <sup>b</sup> | 20.40 ± 1.14 <sup>d</sup>  | 23.71 ± 0.61 <sup>a</sup> | 40.24 ± 3.58 <sup>g</sup> | 54.22 ± 2.39 <sup>f</sup> | 16.11 ± 0.63 <sup>b</sup> | 4.64 ± 0.36 <sup>b</sup> | 22.73 ± 1.37 <sup>c</sup>  | 20.71 ± 0.61 <sup>b</sup>  | 34.91 ± 3.08 <sup>hi</sup> | 53.22 ± 3.00 <sup>f</sup>  |
| 240 mM     | Control      | 1.69 ± 0.18 <sup>l</sup>  | 1.94 ± 0.10 <sup>i</sup> | 9.47 ± 0.81 <sup>j</sup>   | 12.13 ± 0.64 <sup>h</sup> | 91.03 ± 2.06 <sup>a</sup> | 89.75 ± 3.18 <sup>a</sup> | 2.60 ± 0.36 <sup>k</sup>  | 1.82 ± 0.06 <sup>i</sup> | 7.80 ± 1.02 <sup>k</sup>   | 10.13 ± 0.60 <sup>i</sup>  | 92.36 ± 4.05 <sup>a</sup>  | 87.20 ± 5.58 <sup>a</sup>  |
|            | Compost      | 5.44 ± 1.06 <sup>h</sup>  | 3.30 ± 0.06 <sup>f</sup> | 16.87 ± 1.58 <sup>f</sup>  | 16.97 ± 0.99 <sup>e</sup> | 79.43 ± 1.12 <sup>b</sup> | 80.57 ± 1.92 <sup>b</sup> | 4.70 ± 0.15 <sup>i</sup>  | 2.76 ± 0.13 <sup>h</sup> | 17.20 ± 1.15 <sup>f</sup>  | 13.31 ± 0.83 <sup>g</sup>  | 72.76 ± 3.81 <sup>c</sup>  | 79.08 ± 3.62 <sup>bc</sup> |
|            | AMF          | 6.61 ± 0.06 <sup>g</sup>  | 3.33 ± 0.08 <sup>f</sup> | 13.20 ± 0.75 <sup>i</sup>  | 17.96 ± 1.17 <sup>d</sup> | 77.27 ± 1.86 <sup>b</sup> | 76.92 ± 0.21 <sup>c</sup> | 5.63 ± 0.10 <sup>h</sup>  | 3.38 ± 0.21 <sup>f</sup> | 14.53 ± 0.93 <sup>gh</sup> | 17.63 ± 0.38 <sup>de</sup> | 63.93 ± 1.34 <sup>e</sup>  | 72.15 ± 2.72 <sup>d</sup>  |
|            | Compost+ AMF | 16.29 ± 0.06 <sup>b</sup> | 3.00 ± 0.08 <sup>g</sup> | 16.35 ± 0.72 <sup>f</sup>  | 19.16 ± 0.50 <sup>c</sup> | 67.43 ± 2.43 <sup>d</sup> | 69.65 ± 3.37 <sup>d</sup> | 13.61 ± 0.62 <sup>c</sup> | 3.56 ± 0.24 <sup>e</sup> | 19.01 ± 2.21 <sup>e</sup>  | 17.49 ± 1.28 <sup>de</sup> | 58.43 ± 2.72 <sup>f</sup>  | 64.35 ± 1.49 <sup>e</sup>  |

The values of each parameter labeled by different letters indicate significant differences assessed by Duncan's test after performing three-way ANOVA (P<0.05)

**Table S2.** Physiological and water status of date palm plants grown in the absence (0 mM NaCl) and presence (240 mM NaCl) of salt stress with the application of compost and AMF alone or in combination after 10 and 14 months of cultivation.

| NaCl Level | Treatments  | 10 Months Of Cultivation               |                        |                       |                      | 14 Months of Cultivation               |                        |                    |                      |
|------------|-------------|----------------------------------------|------------------------|-----------------------|----------------------|----------------------------------------|------------------------|--------------------|----------------------|
|            |             | $g_s$                                  | LWP                    | RWC                   | $F_v/F_m$            | $g_s$                                  | LWP                    | RWC                | $F_v/F_m$            |
|            |             | ( $\text{mmol m}^{-2} \text{s}^{-1}$ ) | (Bar)                  | (%)                   |                      | ( $\text{mmol m}^{-2} \text{s}^{-1}$ ) | (Bar)                  | (%)                |                      |
| 0 mM       | Control     | $17.63 \pm 1.66^g$                     | $-23.70 \pm 0.98^g$    | $73.72 \pm 1.35^b$    | $0.47 \pm 0.03^f$    | $24.60 \pm 1.22^{ef}$                  | $-24.64 \pm 0.54^g$    | $71.02 \pm 1.25^b$ | $0.55 \pm 0.02^e$    |
|            | Compost     | $26.50 \pm 1.71^{de}$                  | $-16.28 \pm 3.42^{cd}$ | $80.31 \pm 3.22^a$    | $0.77 \pm 0.02^{ab}$ | $44.50 \pm 2.11^c$                     | $-17.27 \pm 2.05^{de}$ | $75.15 \pm 0.39^b$ | $0.77 \pm 0.01^{ab}$ |
|            | AMF         | $45.77 \pm 4.31^c$                     | $-15.96 \pm 1.44^{cd}$ | $82.81 \pm 1.78^a$    | $0.78 \pm 0.03^{ab}$ | $61.63 \pm 1.15^a$                     | $-14.85 \pm 1.75^{cd}$ | $83.51 \pm 4.12^a$ | $0.79 \pm 0.01^a$    |
|            | Compost+AMF | $53.43 \pm 2.80^b$                     | $-11.68 \pm 1.59^{ab}$ | $80.84 \pm 2.12^a$    | $0.77 \pm 0.01^{ab}$ | $50.60 \pm 0.69^b$                     | $-10.46 \pm 1.30^a$    | $73.89 \pm 1.12^b$ | $0.77 \pm 0.01^{ab}$ |
| 240 mM     | Control     | $10.87 \pm 1.72^i$                     | $-31.47 \pm 2.81^h$    | $53.03 \pm 0.76^e$    | $0.39 \pm 0.01^h$    | $14.27 \pm 0.85^h$                     | $-29.84 \pm 2.51^h$    | $52.71 \pm 1.36^e$ | $0.41 \pm 0.03^g$    |
|            | Compost     | $18.10 \pm 1.93^{gi}$                  | $-24.50 \pm 0.89^g$    | $61.74 \pm 3.72^{cd}$ | $0.72 \pm 0.01^d$    | $22.2 \pm 1.44^f$                      | $-20.61 \pm 0.50^f$    | $58.55 \pm 2.33^d$ | $0.74 \pm 0.01^{cd}$ |
|            | AMF         | $23.00 \pm 1.20^f$                     | $-21.97 \pm 1.06^{fg}$ | $65.92 \pm 1.14^c$    | $0.73 \pm 0.01^d$    | $26.53 \pm 0.60^{de}$                  | $-19.61 \pm 0.75^{ef}$ | $63.31 \pm 1.01^c$ | $0.78 \pm 0.01^{ab}$ |
|            | Compost+AMF | $26.67 \pm 1.72^{de}$                  | $-15.30 \pm 0.66^{cd}$ | $61.83 \pm 2.69^{cd}$ | $0.73 \pm 0.01^{cd}$ | $29.57 \pm 1.29^d$                     | $-14.07 \pm 0.77^{bc}$ | $57.83 \pm 4.25^d$ | $0.76 \pm 0.01^{bc}$ |

$g_s$ : Stomatal conductance, LWP: Leaf water potential, RWC: Leaf relative water content and  $F_v/F_m$ : photosystem II efficiency. The values of each parameter labeled by different letters indicate significant differences assessed by Duncan's test after performing three-way ANOVA ( $P < 0.05$ )

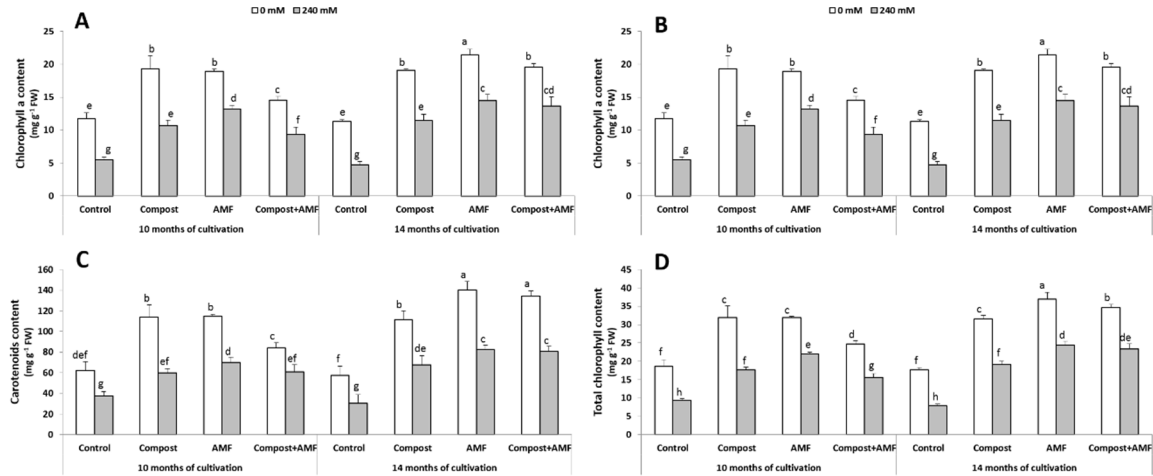

**Figure S1.** Photosynthetic pigment content (chlorophyll a (A), chlorophyll b (B), carotenoids (C) and total chlorophyll (D)) of mycorrhization of date palm plants grown in the absence (0 mM NaCl) and presence (240 mM NaCl) of salt stress with the application of compost and AMF alone or in combination after 10 and 14 months of cultivation. The bars labeled by different letters indicate significant differences assessed by Duncan's test after performing three-way ANOVA ( $P < 0.05$ ).

**Table S3.** Proline and soluble sugars content in shoot and root of date palm plants grown in the absence and presence of salt stress with the application of compost and AMF alone or in combination after 10 and 14 months of cultivation.

| NaCl Level | Treatments  | 10 Months of Cultivation                |                                               |                                         |                                               | 14 Months of Cultivation                |                                               |                                         |                                               |
|------------|-------------|-----------------------------------------|-----------------------------------------------|-----------------------------------------|-----------------------------------------------|-----------------------------------------|-----------------------------------------------|-----------------------------------------|-----------------------------------------------|
|            |             | Shoot                                   |                                               | Root                                    |                                               | Shoot                                   |                                               | Root                                    |                                               |
|            |             | Proline<br>( $\mu\text{mol g}^{-1}$ FW) | Soluble Sugars<br>( $\mu\text{g mg}^{-1}$ FW) | Proline<br>( $\mu\text{mol g}^{-1}$ FW) | Soluble Sugars<br>( $\mu\text{g mg}^{-1}$ FW) | Proline<br>( $\mu\text{mol g}^{-1}$ FW) | Soluble Sugars<br>( $\mu\text{g mg}^{-1}$ FW) | Proline<br>( $\mu\text{mol g}^{-1}$ FW) | Soluble Sugars<br>( $\mu\text{g mg}^{-1}$ FW) |
| 0 mM       | Control     | 11.61 $\pm$ 0.82 <sup>h</sup>           | 386.31 $\pm$ 15.15 <sup>h</sup>               | 34.53 $\pm$ 4.02 <sup>j</sup>           | 78.85 $\pm$ 6.65 <sup>ij</sup>                | 13.27 $\pm$ 1.33 <sup>gh</sup>          | 383.31 $\pm$ 25.01 <sup>h</sup>               | 37.19 $\pm$ 3.45 <sup>j</sup>           | 75.52 $\pm$ 4.29 <sup>j</sup>                 |
|            | Compost     | 13.08 $\pm$ 0.41 <sup>gh</sup>          | 443.61 $\pm$ 33.47 <sup>g</sup>               | 51.27 $\pm$ 4.43 <sup>fg</sup>          | 92.73 $\pm$ 3.38 <sup>ghi</sup>               | 14.42 $\pm$ 1.23 <sup>efg</sup>         | 456.53 $\pm$ 30.22 <sup>fg</sup>              | 49.27 $\pm$ 1.32 <sup>gh</sup>          | 88.54 $\pm$ 2.76 <sup>hij</sup>               |
|            | AMF         | 16.21 $\pm$ 1.95 <sup>de</sup>          | 555.33 $\pm$ 11.87 <sup>c</sup>               | 53.98 $\pm$ 1.70 <sup>f</sup>           | 138.54 $\pm$ 17.82 <sup>cd</sup>              | 15.54 $\pm$ 0.84 <sup>def</sup>         | 516.61 $\pm$ 23.61 <sup>cde</sup>             | 48.98 $\pm$ 1.97 <sup>gh</sup>          | 140.10 $\pm$ 4.18 <sup>cd</sup>               |
|            | Compost+AMF | 13.53 $\pm$ 1.56 <sup>fg</sup>          | 568.97 $\pm$ 1.75 <sup>bc</sup>               | 44.13 $\pm$ 3.15 <sup>i</sup>           | 127.51 $\pm$ 4.61 <sup>de</sup>               | 12.53 $\pm$ 0.47 <sup>gh</sup>          | 497.97 $\pm$ 30.25 <sup>def</sup>             | 45.80 $\pm$ 1.90 <sup>hi</sup>          | 130.84 $\pm$ 9.50 <sup>de</sup>               |
| 240 mM     | Control     | 19.13 $\pm$ 1.14 <sup>c</sup>           | 435.89 $\pm$ 33.71 <sup>g</sup>               | 65.19 $\pm$ 3.65 <sup>de</sup>          | 96.75 $\pm$ 3.41 <sup>gh</sup>                | 17.46 $\pm$ 0.56 <sup>cd</sup>          | 467.01 $\pm$ 29.79 <sup>efg</sup>             | 61.85 $\pm$ 2.15 <sup>e</sup>           | 105.38 $\pm$ 11.55 <sup>fg</sup>              |
|            | Compost     | 23.35 $\pm$ 0.85 <sup>b</sup>           | 563.30 $\pm$ 43.87 <sup>c</sup>               | 79.25 $\pm$ 1.30 <sup>ab</sup>          | 118.22 $\pm$ 1.74 <sup>ef</sup>               | 22.23 $\pm$ 0.95 <sup>b</sup>           | 536.79 $\pm$ 23.62 <sup>cd</sup>              | 69.25 $\pm$ 1.30 <sup>cd</sup>          | 152.23 $\pm$ 8.62 <sup>bc</sup>               |

|             |                           |                             |                           |                             |                           |                              |                           |                             |
|-------------|---------------------------|-----------------------------|---------------------------|-----------------------------|---------------------------|------------------------------|---------------------------|-----------------------------|
| AMF         | 26.79 ± 1.94 <sup>a</sup> | 656.73 ± 14.77 <sup>a</sup> | 81.99 ± 1.81 <sup>a</sup> | 182.46 ± 10.89 <sup>a</sup> | 21.45 ± 1.38 <sup>b</sup> | 616.61 ± 23.61 <sup>ab</sup> | 70.33 ± 1.46 <sup>c</sup> | 190.10 ± 12.15 <sup>a</sup> |
| Compost+AMF | 23.27 ± 0.88 <sup>b</sup> | 649.62 ± 45.15 <sup>a</sup> | 75.85 ± 3.09 <sup>b</sup> | 165.83 ± 3.42 <sup>b</sup>  | 21.61 ± 0.89 <sup>b</sup> | 858.97 ± 38.80 <sup>a</sup>  | 64.52 ± 0.79 <sup>e</sup> | 188.54 ± 2.76 <sup>a</sup>  |

The values of each parameter labeled by different letters indicate significant differences assessed by Duncan's test after performing three-way ANOVA (P<0.05)

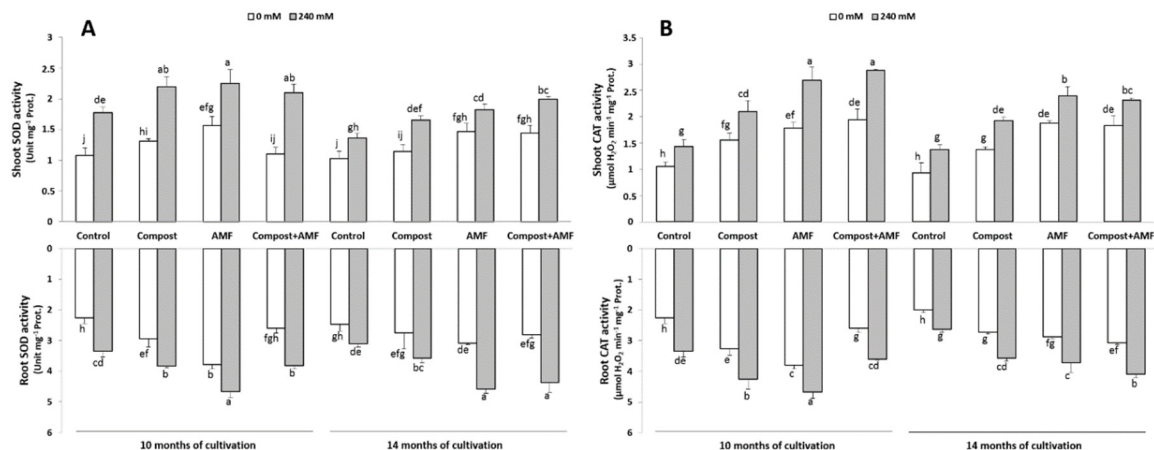

**Figure S2.** SOD (A) and CAT (B) antioxidant enzyme activity in the shoot and the root of mycorrhization of date palm plants grown in the absence (0 mM NaCl) and presence (240 mM NaCl) of salt stress with the application of compost and AMF alone or in combination after 10 and 14 months of cultivation. The bars labeled by different letters indicate significant differences assessed by Duncan's test after performing three-way ANOVA ( $P < 0.05$ ).

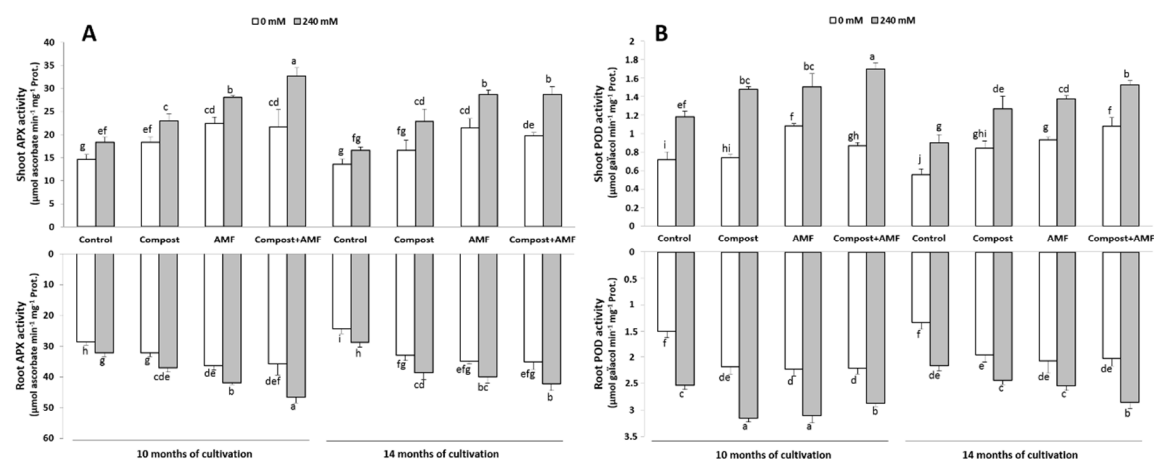

**Figure S3.** APX (A) and POD (B) antioxidant enzyme activity in the shoot and the root of mycorrhization of date palm plants grown in the absence (0 mM NaCl) and presence (240 mM NaCl) of salt stress with the application of compost and AMF alone or in combination after 10 and 14 months of cultivation. The bars labeled by different letters indicate significant differences assessed by Duncan's test after performing three-way ANOVA ( $P < 0.05$ ).
